# Supplementary material
Source: Springer Nature journal article supplement (https://www.springermedizin.de/resource/supplementary/12906_2012_1502_MOESM6_ESM.pdf/9522010)

M<sub>1</sub> 1 5 9 12 16 20 M<sub>2</sub> 11 12 13 14 15 16 17 18 19 20

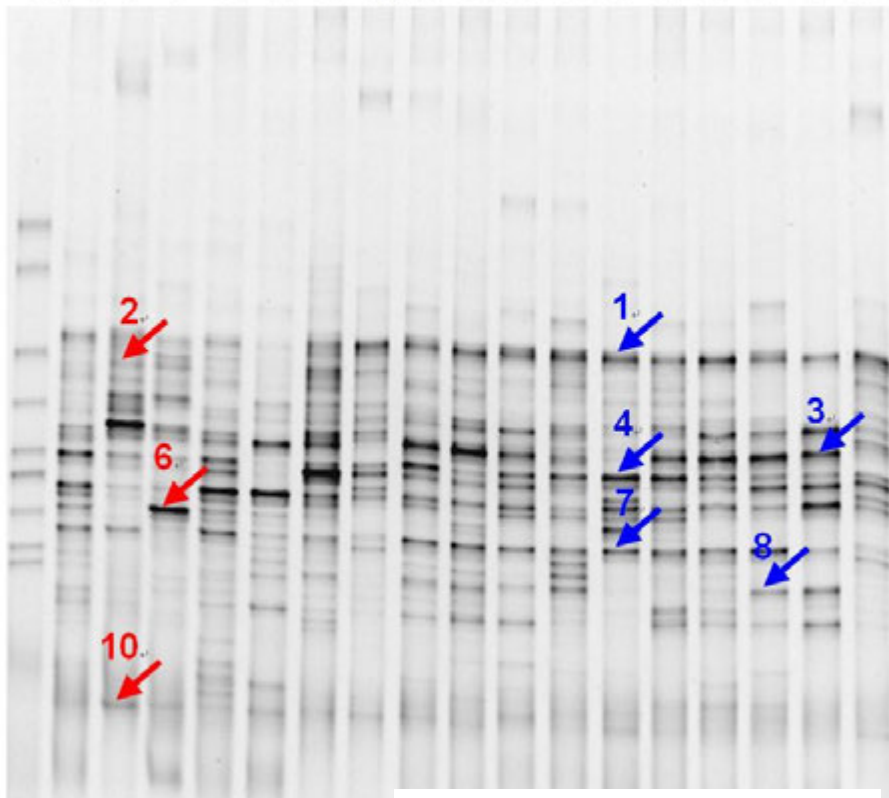

A

B

Supplement: MOESM6 [file 9522010]
